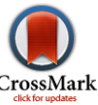

# Clinicopathologic Characterization of Diffuse-Large-B-Cell Lymphoma with an Associated Serum Monoclonal IgM Component

M. Christina Cox<sup>1\*</sup>, Arianna Di Napoli<sup>2</sup>, Stefania Scarpino<sup>2</sup>, Gerardo Salerno<sup>3</sup>, Caterina Tatarelli<sup>1</sup>, Caterina Talerico<sup>2</sup>, Mariangela Lombardi<sup>2</sup>, Bruno Monarca<sup>1</sup>, Sergio Amadori<sup>4</sup>, Luigi Ruco<sup>2</sup>

**1** Hematology Unit, Sant'Andrea Hospital, Department of Clinical and Molecular Medicine La Sapienza University, Rome, Italy, **2** Pathology Unit, Department of Clinical and Molecular Medicine, Sant'Andrea Hospital, La Sapienza University, Rome, Italy, **3** Clinical Pathology Unit, Department of Clinical and Molecular Medicine Sant'Andrea Hospital, La Sapienza University, Rome, Italy, **4** Hematology Department, Tor Vergata University, Rome, Italy

## Abstract

Recently, diffuse-large-B-cell lymphoma (DLBCL) associated with serum IgM monoclonal component (MC) has been shown to be a very poor prognostic subset although, detailed pathological and molecular data are still lacking. In the present study, the clinicopathological features and survival of IgM-secreting DLBCL were analyzed and compared to non-secreting cases in a series of 151 conventional DLBCL treated with R-CHOP. IgM MC was detected in 19 (12.5%) out of 151 patients at disease onset. In 17 of these cases secretion was likely due to the neoplastic clone, as suggested by the expression of heavy chain IgM protein in the cytoplasm of tumor cells. In IgM-secreting cases immunoblastic features ( $p < .0001$ ), non-GCB-type ( $p = .002$ ) stage III-IV ( $p = .003$ ),  $\geq 2$  extra nodal sites ( $p < .0001$ ), bone-marrow ( $p = .002$ ), central-nervous-system (CNS) involvement at disease onset or relapse ( $p < .0001$ ), IPI-score 3–5 ( $p = .009$ ) and failure to achieve complete remission ( $p = .005$ ), were significantly more frequent. FISH analyses for BCL2, BCL6 and MYC gene rearrangements detected only two cases harboring BCL2 gene translocation and in one case a concomitant BCL6 gene translocation was also observed. None of the IgM-secreting DLBCL was found to have L265P mutation of MYD88 gene. Thirty-six month event-free (11.8% vs 66.4%  $p < .0001$ ), progression-free (23.5% vs 75.7%,  $p < .0001$ ) and overall (47.1% vs 74.8%,  $p < .0001$ ) survivals were significantly worse in the IgM-secreting group. In multivariate analysis IgM-secreting ( $p = .005$ ,  $\text{expB} = 0.339$ ,  $\text{CI} = 0.160\text{--}0.716$ ) and IPI-score 3–5 ( $p = .010$ ,  $\text{expB} = 0.274$ ,  $\text{CI} = 0.102\text{--}0.737$ ) were the only significant factors for progression-free-survival. Notably, four relapsed patients, who were treated with salvage immunochemotherapy combined with bortezomib or lenalidomide, achieved lasting remission. Our data suggests that IgM-secreting cases are a distinct subset of DLBCL, originating from activated-B-cells with terminally differentiated features, prevalent extra nodal dissemination and at high risk of CNS involvement.

**Citation:** Cox MC, Di Napoli A, Scarpino S, Salerno G, Tatarelli C, et al. (2014) Clinicopathologic Characterization of Diffuse-Large-B-Cell Lymphoma with an Associated Serum Monoclonal IgM Component. PLoS ONE 9(4): e93903. doi:10.1371/journal.pone.0093903

**Editor:** Kristy L. Richards, University of North Carolina at Chapel Hill, United States of America

**Received:** August 27, 2013; **Accepted:** March 9, 2014; **Published:** April 4, 2014

**Copyright:** © 2014 Cox et al. This is an open-access article distributed under the terms of the Creative Commons Attribution License, which permits unrestricted use, distribution, and reproduction in any medium, provided the original author and source are credited.

**Funding:** Fondi di ricerca di Ateneo. The funders had no role in study design, data collection and analysis, decision to publish, or preparation of the manuscript.

**Competing Interests:** The authors have declared that no competing interests exist.

\* E-mail: chrisscox@gmail.com

† These authors contributed equally to this work.

## Introduction

Diffuse-Large-B-cell Lymphoma (DLBCL) is a biologically heterogeneous entity [1], that is still homogeneously treated with Rituximab-Cyclophosphamide-Adriamycin-Vincristine-Prednisone (R-CHOP) immunochemotherapy [2]. Since the combination of rituximab and CHOP became the gold standard for DLBCL treatment, the International-Prognostic-Index score (IPI-score) has proved to be less powerful [3]. Moreover, the IPI variables [4] do not provide insight into DLBCL biology. A pivotal step in unveiling DLBCL biology and clinical heterogeneity was achieved in 2000 when Alizadeh et al. identified by gene-expression-profiling (GEP) two main groups of DLBCL with substantially different outcomes: Activated-B-cell type (ABC-type) and Germinal-Center-B-cell type (GCB-type) [5]. Since then considerable efforts have been made in order to translate the complexity of GEP-derived information into fewer data readily

achievable by routine tests. However, this attempt is still in progress [6], and the choice of shifting towards an upfront intensified treatment remains largely based on the IPI-score or on IPI-derived scores [7,8]. Notwithstanding, new biomarkers and scores are needed to identify very poor-risk DLBCL sub-groups [9–12]. During the course of 2011 we noticed that three newly diagnosed DLBCL patients who shared poor presenting features and early relapse after R-CHOP, had a serum IgM monoclonal component (MC) at disease onset. In the literature only few occasional studies describing IgM-secreting DLBCL associated to haemolytic anemia or other paraproteinemia related events were reported [13–15]. In order to find out whether our observation was just an incidental finding, we started to search for similar cases in our database. In 2011 Maurer *et al.* [16], showed that in DLBCL increased serum free light chain (FLC) represented an independent adverse prognostic factor and in 2013 Jardin *et al.* [17] found that an abnormal IgM $\kappa$ /IgM $\lambda$  ratio was associated

with survival in patients with DLBCL. In this study we have further increased and characterized a series of DLBCL with an associated IgM MC [18], reporting detailed analysis of their clinical, histological and molecular features.

## Methods

### Patients

This is a retrospective study evaluating the incidence of IgM-secreting DLBCL and comparing this subset with a non-secreting control group for clinicopathological features and survival. The study was approved by our Institutional Review Board (procedure code: RS 44/2013, Sant'Andrea Hospital Ethics Committee) and was conducted in accordance with the regulations of health information protection policies. Patients were asked to sign a written consent at disease onset in order to collect their data on an electronic database and to allow further pathological characterization of biological material harvested for diagnostic purposes. Clinical data, including HCV and HBV markers screening, were prospectively collected and obtained from corresponding medical records. A hundred and fifty-one patients (68F/83M, median age 62 years) diagnosed with conventional *de novo* DLBCL [19] between 2005 and February 2013 at Sant'Andrea Hospital of Rome were enrolled in the study. All 151 patients were analyzed for serum protein electrophoresis at disease onset, and those who had a likely monoclonal band in the serum were further investigated by serum immunofixation (methods are fully described in File S1). From the 151 patients a set of 107 consecutive non-secreting DLBCL were selected as control cases for survival analysis. All these cases had a follow up time  $\geq 24$  months, unless a DLBCL-related event (i.e. primary refractoriness, relapse or death) had occurred earlier. Immunodeficiency-associated lymphomas, patients who had been previously treated with radiotherapy or chemotherapy for low-grade lymphoma and patients with stage I non-bulky were excluded from the study.

High risk patients younger than 61 years were treated with R-CHOP every 14 days [20], all other patients with R-CHOP every 21 days [2]. Patients with central nervous system (CNS) involvement were treated with R-CHOP every 21 days plus high dose methotrexate at day +8. Patients with IPI score 4–5 or involvement of bone marrow, testis, and craniofacial sites or with involvement of  $\geq 2$  extra nodal sites, received intrathecal prophylaxis with 4–6 injections of 12 mg methotrexate.

### HCV and HBV test

Before chemotherapy all patients were tested for hepatitis B surface antigen and its antibody (HBsAg, HBsAb), antibodies to the core antigen (HBcAb, total and IgM), and for hepatitis C virus (HCV) antibodies. Commercially available enzyme immunoassays were used for HBV and HCV determinations (Architect, Abbott Diagnostics, Italy). All cases were tested for hepatitis B virus deoxyribonucleic acid polymerase chain reaction (Amplicor Roche, Italy- lower limit of detection  $< 200$  cp/ml). Only cases that were positive for HCV antibodies were further investigated for HCV-RNA (Amplicor Roche, Italy). Either active, inactive or occult HBV carriers [21] were classified as HBV-positive. Cases were considered HCV-positive if HCV antibodies were positive (Table 1).

### Morphological and Immunohistochemical analyses

Classification and subtyping of all tumors followed the definitions of the 2008 WHO classification of DLBCL [19]. Immunostainings for CD3, CD5, CD20, CD79a, CD10, MUM1, BCL2, BCL6, kappa and lambda light chains and heavy chain

IgM (all purchased by DAKO, Denmark) were performed using Dako automated immunostainer (DAKO, Denmark). Immunohistochemistry with anti-MYC (clone Y69, Ventana-Roche, Italy) was conducted using BenchMark Ultra automated immunostainer (Ventana Medical Systems, Tucson, AZ, USA). The Hans algorithm [22] was used in order to classify cases as GCB-type or non GCB-type. Immunostaining results for BCL2 and MYC were recorded as the percentage of positive cells in increments of 10% regardless of the intensity of the staining. Cases were considered as negative if  $< 5\%$  of tumor cells were positive. Immunohistochemical and morphological analyses were independently evaluated by two experienced hematopathologists (LR, ADN). Disagreements were resolved by joint review on a multi-head microscope.

### FISH and molecular analyses

Since the aim of this study was to define the clinicopathologic features of the IgM-secreting subset, the analyses of recurring chromosomal translocations, MYD88 gene mutation, the BCL2/MYC immunohistochemical score, and the presence of EBV-infection were carried out only in the IgM-secreting subset and in a small control group of non-secreting DLBCL cases (Table S1 in File S1). FISH analyses in tissue paraffin sections were carried out with the following probes: MYC dual color break-apart, BCL6 dual color break-apart; IGH/BCL2 dual color fusion (Vysis, Abbott Molecular Inc. US), and BCL2 dual color break-apart (Kreatech Diagnostics, The Netherlands). The cut-off values for the interphase FISH analyses were established following the criteria of Ventura [23]. In situ hybridization for EBV-encoded RNA (EBER) was performed on paraffin sections using Epstein - Barr virus (EBER) PNA Probe/Fluorescein, and FITC/HRP (DAKO, Denmark)

Allele-specific polymerase chain reaction (AS-PCR) was performed using two reverse primers designed to recognize the mutant and the wild-type allele of MYD88 L265P as previously described [24]. The mutant-specific reverse primer was 5'-CCT TGT ACT TGA TGG GGA aCG-3' and the wild-type-specific reverse primer was 5'-GCC TTG TAC TTG ATG GGG AAC A-3'. The common forward primer was 5'-AAT GTG TGC CAG GGG TAC TTA G-3'. PCR reaction was performed using AmpliTaq Gold PCR Master Mix (Applied Biosystems, Forster City, CA, USA) in a final volume of 25 mL with 50 nM of each primer and 100 ng of DNA. Thermal cycling conditions were as follow: 2 min. at 94°C, followed by 40 cycles of 94°C for 30 s, 57°C for 30 s. and a final extension at 68°C for 5 min. The amplified PCR products (159 bp) were separated on 2% agarose gel. One case of Waldenström macroglobulinemia was used as MYD88 L265P mutation positive control (Detailed methodologies are fully described in File S1).

### Statistics

Categorical data were compared using Fisher's exact test and two-sided p-value, whereas for ordinal data, non-parametric tests were used. The definitions of complete response (CR), event free survival (EFS), progression free survival (PFS) and overall survival (OS) were the standard [25]. The actuarial survival analysis was carried out according to the method described by Kaplan and Meier and the curves compared by the log-rank test [26]. The multivariate analyses for survival were carried out by using the stepwise proportional hazards model [27]. Statistical analyses were done with IBM SPSS Statistics 19 (SPSS Inc. Chicago, IL, USA).

**Table 1.** Comparison of clinicopathological features in DLBCL subgroups.

| Features (cases investigated)            | IgM-secreting<br>n = 17 | Non-secreting<br>n = 134 | P-value <sup>1</sup> | IgM+/non secreting<br>n = 34 | P-value <sup>2</sup> |
|------------------------------------------|-------------------------|--------------------------|----------------------|------------------------------|----------------------|
| ALC $\leq$ 0.840. $10^9/L^3$ (n = 143)   | 47%(7/15)               | 24%(31/128)              | .118                 | 23%(7/30)                    | .265                 |
| BULKY >7.5 cm (n = 151)                  | 23%(4/17)               | 36%(48/134)              | .248                 | 41%(14/34)                   | .320                 |
| HBV+ (n = 148)                           | 25%(4/16)               | 13.6%(18/132)            | .261                 | 18%(18/34)                   | .707                 |
| HCV+ (n = 141)                           | 19%(3/16)               | 13%(16/125)              | .368                 | 9%(3/34)                     | .370                 |
| Anemia <12 g/dL (n = 139)                | 71%(12/17)              | 42%(51/122)              | .036                 | 39%(13/33)                   | .072                 |
| Sex female (n = 151)                     | 70%(13/17)              | 41%(134)                 | .008                 | 47%(16/34)                   | .072                 |
| COO <sup>4</sup> : non-GCB-type (n = 41) | 100%(17/17)             | 54.4%(49/90)             | .001                 | 85%(29/34) <sup>3</sup>      | .357                 |
| COO: GCB-type (n = 66)                   | 0%(0/17)                | 45.5%(41/90)             | .001                 | 12%(4/34)                    | .357                 |
| Immunoblastic-Morphology (n = 151)       | 76%(13/17)              | 3%(4/134)                | <.0001               | 9%(n = 3/34)                 | <.0001               |
| Bone Marrow+ (n = 149)                   | 71% (12/17)             | 28%(37/132)              | .002                 | 23.5% (8/34)                 | .002                 |
| CNS <sup>5</sup> (n = 124)               | 41%(7/17)               | 4%(4/107)                | <.0001               | 9%(3/34)                     | .010                 |
| Age >60 (n = 151)                        | 82%(14/17)              | 54%(75/134)              | .040                 | 62%(21/34)                   | .203                 |
| LDH abnormal (n = 148)                   | 56%(9/16)               | 52%(69/132)              | .797                 | 48%(16/33)                   | .762                 |
| Extra nodal sites $\geq$ 2 (n = 151)     | 82%(14/17)              | 34%(46/134)              | <.0001               | 32% (11/34)                  | .001                 |
| Stage 3–4 (n = 150)                      | 100%(17/17)             | 68%(91/134)              | .003                 | 73%(24/33)                   | .020                 |
| ECOG-PS <sup>6</sup> $\geq$ 2 (n = 151)  | 59%(10/17)              | 33%(44/134)              | .057                 | 32%(11/34)                   | .130                 |
| IPI 3–5 <sup>7</sup> (n = 149)           | 88%(15/17)              | 55%(73/133)              | .009                 | 47%(16/34)                   | .006                 |
| Complete Remission (n = 151)             | 47%(8/17)               | 80.5%(108/134)           | .005                 | 79%(27/34)                   | .027                 |

p-value<sup>1</sup>: comparison of clinical features in IgM-secreting and non-secreting DLBCL subgroups.

p-value<sup>2</sup>: comparison of clinical features in IgM-secreting and IgM+/non-secreting DLBCL subgroups.

ALC<sup>3</sup>: absolute lymphocyte count.

COO<sup>4</sup>: cell of origin based on the Hans algorithm.

CNS<sup>5</sup>: central nervous system involvement at diagnosis or relapse.

ECOG-PS<sup>6</sup> $\geq$ 2: performance status following the ECOG nomenclature.

IPI 3–5<sup>7</sup>: International prognostic index score 3–5.

doi:10.1371/journal.pone.0093903.t001

## Results

### IgM serum levels at diagnosis and during follow-up

In 19 out of 151 (12.6%) DLBCL a serum monoclonal IgM component was detected. The serum level of monoclonal IgM at diagnosis varied from 2.5 g/dL to 0.22 g/dL (median value 0.42 g/dL). Eleven out of 19 (58%) patients were monitored by serum immunofixation and FLC k/ $\lambda$  ratio during the course of treatment and follow-up. After 1–3 cycles of R-CHOP the monoclonal IgM component disappeared and the FLC k/ $\lambda$  ratio returned to the normal range in all of these patients. Three out of four patients (75%) at tumor recurrence were negative for serum monoclonal IgM and had a normal FLC k/ $\lambda$  ratio. In the remaining case the reappearance of a monoclonal IgM and of FLC k/ $\lambda$  abnormal ratio preceded relapse. Four patients who are in continuous complete remission are persistently negative for both. Two patients with an IgM MC not related to the neoplastic clone (Table 2) showed no disappearance of the IgM MC during and after treatment.

### Pathological Features

One-hundred and seven out of 151 (71%) DLBCL were suitable to be classified for the cell-of-origin (COO) using the Hans algorithm [22]. Of these, 66 out of 107 cases (61.6%) were classified as non-GCB-type and 41 out of 107 (38.3%) as GCB-type. The same cases were also analyzed for the expression of cytoplasmic IgM chains, except for five cases (4.7%) in which one of the two assessments was not achievable (Figure 1). Fifty-one out

of 107 DLBCL (47.6%) showed IgM expression in the cytoplasm of tumor cells (IgM+ cases); of these, 47 cases (92%) were classified as non-GCB-type and four cases (7.8%) as GCB-type. Within the IgM+ group 17/51 (33.3%) DLBCL had an associated serum IgM monoclonal component. Immunostaining of paraffin tissue sections allowed to detect in the tumor cells the same type of heavy chain IgM, and of light chain  $\kappa$  (n = 15) or  $\lambda$  (n = 2) found in patient's serum. These findings suggest that the serum monoclonal IgM component was related to the DLBCL clone. These 17 cases are from here on referred as IgM-secreting DLBCL (Table 1). The remaining 34/51 cases (66.6%) are referred as IgM+/non-secreting DLBCL. Two additional patients had a monoclonal IgM component in the serum although, tumors stained negative for cytoplasmic IgM (Table 2). All 17 IgM-secreting cases were CD10 negative and MUM1 positive and were classified as non-GCB-type. Moreover, based on the morphology 13 out of the 17 (76%) cases were classified as immunoblastic DLBCL (Figure S1 in File S1) compared to only 4 out of 134 (3%) cases in the control group (p<.0001) and 3 out of 34 (9%) in the IgM+/non-secreting subset (p<.0001) (Table 1). Nine patients out of 134 (6.8%) in the non IgM-secreting group and one out of 17 (5.8%) in the IgM-secreting group had composite lymphoma at diagnosis with the simultaneous presence of DLBCL and a low-grade B-cell lymphoma.

### Molecular analyses

Molecular analyses were performed in the IgM-secreting DLBCL and in a control group of non-secreting DLBCL (Table

**Table 2.** Clinicopathological features of 19 DLBCL with a serum monoclonal IgM protein.

| Cases | Extra nodal sites                   | Morphology    | COO <sup>2</sup> | IgM-I <sup>3</sup> | EBER | LMP1 | HIV | MYC-I <sup>4</sup> | BCL2-I <sup>5</sup> | MYC-I <sup>6</sup> | BCL2-I <sup>7</sup> | BCL6-I <sup>8</sup> | MYD88 <sup>9</sup> | FUP- <sup>10</sup> | Status              |
|-------|-------------------------------------|---------------|------------------|--------------------|------|------|-----|--------------------|---------------------|--------------------|---------------------|---------------------|--------------------|--------------------|---------------------|
| 1     | CNS <sup>1</sup> , Liver            | Immunoblastic | Non -GCB         | +                  | neg  | neg  | neg | 90%                | 70%                 | NE <sup>11</sup>   | NE                  | NE                  | WT <sup>16</sup>   | 5                  | Died in progression |
| 2     | Marrow, Liver, Lung, CNS            | Immunoblastic | Non -GCB         | +                  | neg  | neg  | neg | 50%                | 40%                 | NE                 | NT <sup>12</sup>    | NE                  | WT                 | 5                  | Died in progression |
| 3     | Bone, Marrow, PB, CNS               | Immunoblastic | Non -GCB         | +                  | neg  | neg  | neg | 90%                | 80%                 | NT                 | T <sup>13</sup>     | T                   | WT                 | 19                 | Died in progression |
| 4     | Lung, Marrow, CNS                   | Immunoblastic | Non-GCB          | +                  | neg  | neg  | neg | 70%                | neg                 | NE                 | NE                  | NE                  | WT                 | 1                  | Early death         |
| 5     | Bone, CNS, Marrow                   | Immunoblastic | Non-GCB          | +                  | NE   | NE   | neg | NE                 | NE                  | NT                 | NT                  | NT                  | NE                 | 14                 | Died in progression |
| 6     | Kidney, Gut, Adrenal gland, CNS     | Immunoblastic | Non-GCB          | +                  | neg  | neg  | neg | 20%                | 20%                 | NT                 | T                   | NT                  | WT                 | 4                  | Died in progression |
| 7     | Intestine, mesenter                 | DLBCL         | Non -GCB         | +                  | neg  | neg  | neg | 40%                | >90%                | NT                 | NT                  | NT                  | WT                 | 60                 | CCR1 <sup>14</sup>  |
| 8     | Bone, Marrow, PB, bones             | Immunoblastic | Non -GCB         | +                  | neg  | neg  | neg | 40%                | 50%                 | NT                 | NT                  | NT                  | WT                 | 18                 | CCR1                |
| 9     | Marrow, PB                          | Immunoblastic | Non -GCB         | +                  | neg  | neg  | neg | 60%                | 70%                 | NT                 | NT                  | NT                  | WT                 | 38                 | CCR1                |
| 10    | Lung, Marrow                        | Immunoblastic | Non -GCB         | +                  | neg  | neg  | neg | 10%                | 60%                 | NT                 | NT                  | NT                  | WT                 | 29                 | CCR2 <sup>15</sup>  |
| 11    | Pharynx                             | Immunoblastic | Non -GCB         | +                  | neg  | neg  | neg | 30%                | >90%                | NT                 | NT                  | NT                  | WT                 | 41                 | CCR2                |
| 12    | Marrow, PB                          | Immunoblastic | Non -GCB         | +                  | neg  | neg  | neg | 20%                | neg                 | NT                 | NE                  | NE                  | WT                 | 60                 | CCR2                |
| 13    | Pharynx, Marrow                     | Immunoblastic | Non -GCB         | +                  | neg  | neg  | neg | 40%                | 50–60%              | NT                 | NT                  | NT                  | WT                 | 22                 | CCR2                |
| 14    | None                                | T-cell rich   | Non -GCB         | +                  | neg  | neg  | neg | 10–20%             | 80%                 | NT                 | NT                  | NT                  | WT                 | 35                 | Died in progression |
| 15    | None                                | Immunoblastic | Non -GCB         | +                  | neg  | neg  | neg | 40%                | >90%                | NT                 | NT                  | NT                  | WT                 | 1                  | Early death         |
| 16    | Kidney, intestine, peritoneum, bone | DLBCL         | Non-GCB          | +                  | NE   | NE   | neg | NE                 | 60%                 | NE                 | NE                  | NE                  | NE                 | 2                  | Died refractory     |
| 17    | Marrow, pharynx, CNS                | DLBCL         | Non-GCB          | +                  | neg  | neg  | neg | 60–70%             | >90%                | NT                 | NT                  | NT                  | WT                 | 5                  | On treatment        |
| 18    | Marrow, Uterus                      | Centroblastic | GCB              | -                  | neg  | neg  | neg | 4%                 | >90%                | NT                 | NT                  | NE                  | WT                 | 16                 | Died in progression |
| 19    | Bone                                | DLBCL         | Non-GCB          | -                  | neg  | neg  | neg | 20–30%             | 60%                 | NE                 | NE                  | NT                  | WT                 | 7                  | On treatment        |

CNS<sup>1</sup>: Central nervous system involvement at diagnosis or during relapse progression.

COO<sup>2</sup>: Cell of Origin defined by the Hans algorithm.

IgM-I<sup>3</sup>: heavy chain IgM expression assessed by immunohistochemistry.

MYC-I<sup>4</sup>: MYC protein expression by immunohistochemistry.

BCL2-I<sup>5</sup>: BCL2 protein expression by immunohistochemistry.

MYC-I<sup>6</sup>: MYC gene translocation by FISH analysis.

BCL2-I<sup>7</sup>: BCL2 gene translocation by FISH analysis.

BCL6-I<sup>8</sup>: BCL6 gene translocation by FISH analysis.

MYD88<sup>9</sup>: MYD88 gene analyzed for L265P mutation.

FUP<sup>10</sup>: Follow-up.

NE<sup>11</sup>: Not evaluable.

NT<sup>12</sup>: Not translocated.

T<sup>13</sup>: Translocated.

CCR1<sup>14</sup>: Continuous complete remission.

CCR2<sup>15</sup>: 2<sup>nd</sup> Continuous complete remission.

WT<sup>16</sup>: wild type.

doi:10.1371/journal.pone.0093903.t002

|                         | IgM-secreting DLBC | Non-secreting DLBC | IgM IHC | COO | Survival Analysis |
|-------------------------|--------------------|--------------------|---------|-----|-------------------|
| Protein Electrophoresis | 17                 | 134                | 107     | 107 | 124               |
| Survival Analysis       | 17                 | 107                | 107     | 107 |                   |
| COO                     | 17                 | 90                 | 102     |     |                   |
| IgM IHC                 | 17                 | 90                 |         |     |                   |

**Figure 1. The cross table diagram shows in the colored rectangles the type of analysis that was carried out or the subgroup of DLBCL (non-secreting and IgM-secreting).** The white rectangles show the number of cases that match the crossing of horizontal and vertical rows.

doi:10.1371/journal.pone.0093903.g001

S1 in File S1). A total of 35 cases were studied for EBV-status, 45 cases for common chromosomal translocations and 30 cases for L265P somatic mutation of MYD88 gene respectively. The results of these analyses did not differ from data reported in the literature [28–30]. In the 19 DLBCL patients with a serum IgM MC (Table 2), EBER and LMP1 were evaluable in 17 cases (89.5%) and all of them were negative. None of the 16 evaluable IgM-secreting DLBCL showed MYD88 L265P mutation (Figure S2 File S1). In cases with serum IgM MC FISH analyses were feasible for MYC and BCL2 translocations in 14/19 (74%), and for BCL6 gene rearrangements in 13/19 (68.4%) cases respectively. Two IgM-secreting cases harbored BCL2 translocation; one of these had concomitant translocation of BCL6 gene (Table 2). None of the IgM-secreting cases investigated was found to be rearranged for MYC. Overall, the incidence of chromosomal translocations, and of MYD88 L265P mutation (Figure S2 in File S1) were lower in the IgM-secreting group compared to the control group although the differences were not statistically significant.

### Clinical features and outcome

All the DLBCL (n = 151) were analyzed for clinical characteristics and prognostic scores (Table 1). One-hundred and twenty-four patients out of 151 (82%) with a follow-up  $\geq 24$  months or a DLBCL-related event (i.e. primary refractoriness, relapse or death) were considered suitable for survival analysis (Figure 2a). One-hundred and seven patients out of the 124 cases included in the survival analysis (Figure 1) were tested for COO and IgM expression. All the 17 IgM-secreting cases were of the non-GCB-type (100%) in contrast to only 50/90 (55%) in the non-secreting tumors (p = .002). The following clinicopathological features were significantly more frequent in the IgM-secreting group compared to the non-secreting group and also compared to the IgM+/non-secreting subset: immunoblastic morphology, advanced stage of disease, IPI score 3–5, extra nodal involvement  $\geq 2$ , bone marrow and central nervous system (CNS) involvement, failure to achieve complete remission after R-CHOP. Anemia, female sex and age > 60 years were significantly more frequent in the IgM-secreting compared to the non-secreting group (Table 1). Sixteen out of 17 IgM-secreting DLBCL (94%) were *de-novo* DLBCL without a

previous history of low-grade lymphoma. One patient was diagnosed with nodal marginal zone lymphoma ten years earlier, but she did not receive any treatment before transformation into DLBCL. One patient had autoimmune hemolytic anemia related to the monoclonal IgM antibody; another with massive kidney infiltration by DLBCL presented a nephrotic syndrome with intact monoclonal IgM in the urine. In the remaining 15 cases no other paraproteinemia-related signs were observed.

Fifteen out of 17 (88.2%) IgM-secreting patients had a DLBCL-related event compared to 36 out of 107 (33.6%) control cases (p < .0001). Nine out of 17 (53%) IgM-secreting patients and 27 out of 107 (25%) control cases died (p < .0001). In the IgM-secreting group, seven patients died with primary refractory or relapsed lymphoma. Two patients died within one month from the start of treatment for toxicity: one patient was in very poor conditions with diffuse meningeal and brain involvement, while the other died of ischemic stroke during treatment. Worthy of note, seven out of 17 IgM-secreting patients (41%) had CNS localization at disease onset (2/17 cases) or during progression/relapse (5/17 cases) (Table 2). One of these patients achieved partial remission on third line treatment with low dose bendamustine and lenalidomide but died in progression after eight months. Eight out of 17 IgM-secreting patients (47%) are alive. Two patients who relapsed within eight months from diagnosis are progression free at +33 and +21 months respectively after second line salvage treatment with bortezomib-rituximab-DHAP [31] followed by high dose therapy (HDT) and peripheral blood stem cell (PBSC) rescue. One patient is progression free at +36 months after second line salvage treatment with rituximab-bendamustine and lenalidomide maintenance [32]. One patient who relapsed ten months after diagnosis is in 2<sup>nd</sup> complete remission at +12 months after rituximab-DHAP and lenalidomide maintenance. One patient, who achieved less than partial remission after four cycles of R-CHOP, is presently in 1<sup>st</sup> CR after two cycles of RMAD [33] at +15 months. One patient had CNS progression after two cycles of R-CHOP and is responding to high-dose methotrexate. Only two patients are progression free after first line R-CHOP at +60 and +38 months respectively. Of the two patients who had a monoclonal IgM component in the serum but were negative for heavy chain IgM

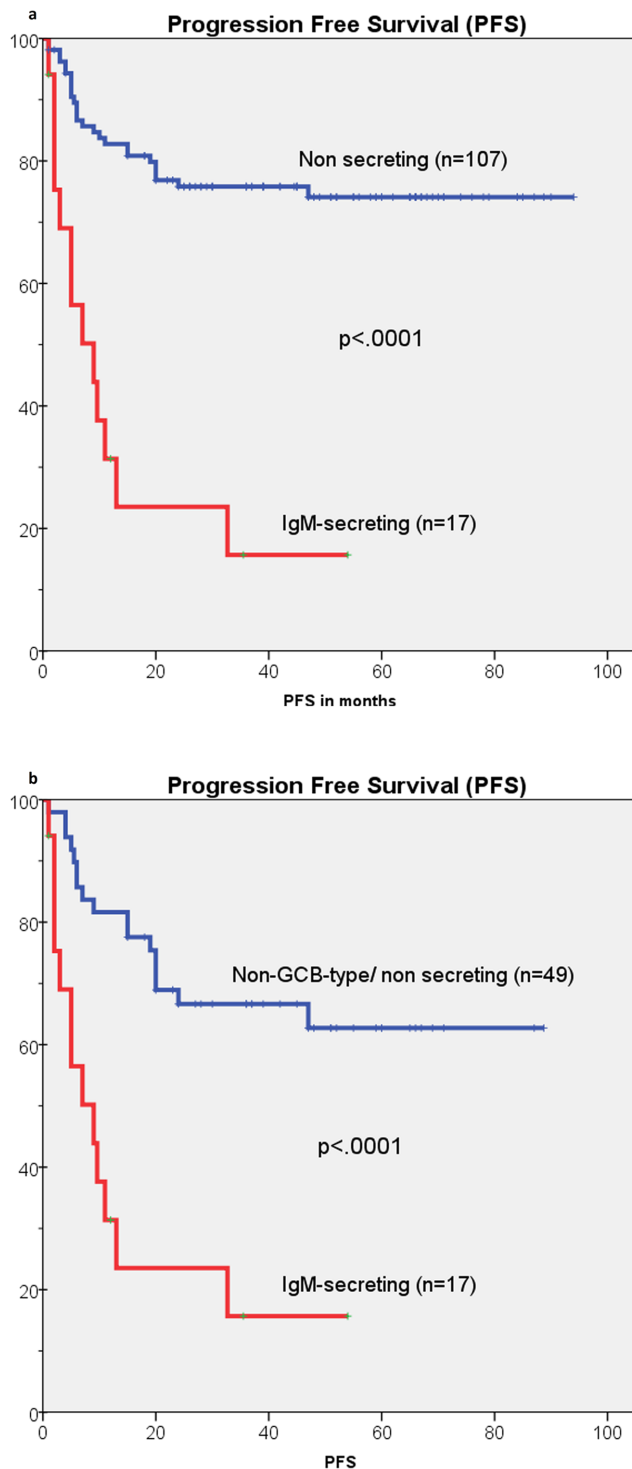

**Figure 2. Kaplan-Meier estimates of progression free survival (PFS) in IgM-secreting and in non-secreting DLBCL patients.** a) PFS of IgM-secreting and non-secreting DLBCL patients; b) PFS of IgM-secreting and non-GCB-type DLBCL patients. doi:10.1371/journal.pone.0093903.g002

expression by IHC (Table 2), one died with resistant relapse 16 months after diagnosis, while the other is in complete remission seven months after diagnosis (Table 2).

## Survival analysis

The estimated 36-month PFS (23.5% vs 75.7%,  $p < .0001$ ) (Figure 2a) and OS (47.1% Vs 74.8%,  $p < .0001$ ) were significantly worse for the IgM-secreting compared to the non-secreting group (Table 3). The differences in survival remained significant even when the IgM-secreting group was compared to the non-GCB-type (Figure 2b). In multivariate analysis (Table 4), IgM-secreting ( $p = .005$ ,  $\text{expB} = 0.339$ ,  $\text{CI} = 0.160\text{--}0.716$ ) and IPI-score 3–5 ( $p = .010$ ,  $\text{expB} = 0.274$ ,  $\text{CI} = 0.102\text{--}0.737$ ) were the only significant factors for PFS; while IPI-score 3–5 was the only significant factor for OS ( $p = .001$ ,  $\text{expB} = 0.186$ ,  $\text{CI} = 0.071\text{--}0.484$ ). A subset of 107/124 (86%) patients who were investigated by IHC for heavy chain IgM expression in tumor samples, were analyzed for the relevance of this factor. The expression of IgM was a significant prognostic factor in univariate analysis (Figure 3a) for PFS ( $p = .009$ ) and OS ( $p = .024$ ). However, when patients were subdivided into three sub-groups: 1) IgM-negative ( $n = 56$ ); 2) IgM+/non-secreting ( $n = 34$ ) and 3) IgM-secreting ( $n = 17$ ) survival analysis showed a significant difference only between the IgM-secreting group versus the other two groups (Figure 3b and Figure S3 in File S1).

## Discussion

The identification of poor-prognostic subgroups correlated to defined biological tumor characteristics is the aim of modern oncological research. In the case of DLBCL this issue is presently a matter of intense development and debate. Several prognostic factors and scores have been proposed to better stratify patients who would benefit from more intensive treatment than R-CHOP [5,10,11]. We had previously reported on a subset of conventional DLBCL associated with a serum monoclonal IgM component characterized by advanced disease and poor prognosis after R-CHOP [18]. In this study we described its clinical, pathological and, molecular features more in depth.

DLBCL with serum IgM MC represented a sizable subset of our series. The majority of these cases were defined as IgM-secreting DLBCL since same type of heavy chain IgM and  $\kappa$  or  $\lambda$  light chains were detected in tumor cells. Most patients had advanced disease, involvement of several extra nodal sites including bone marrow and high IPI-score. Worthy of note, the incidence of CNS involvement at diagnosis or during relapse/progression was surprisingly high. Most of these poor prognostic features remained significantly more frequent in the IgM-secreting subset even when compared to the IgM+/non-secreting subset. Monitoring patients by immunofixation and FLC  $\kappa/\lambda$  ratio during and after therapy was of little value for predicting relapse. All IgM-secreting cases were classified as non-GCB-type and the great majority showed Immunoblastic morphology.

L265P mutation of MYD88 gene has been reported within 6.5% and 17% of unselected DLBCL [28–30]. More recently, this mutation has been shown to be very common in DLBCL originating in extra nodal sites [30]. Since L265P mutation of MYD88 gene was prevalent in IgM-secreting Waldenström macroglobulinemia [24], and it was reported in up to 29% of DLBCL with an ABC-type [34], we expected to find this mutation in the IgM-secreting DLBCL subset. Surprisingly, none of IgM-secreting DLBCL showed L265P mutation of MYD88 gene. This result suggests that other molecular pathways may be involved in IgM-secreting DLBCL [35].

Recurring chromosomal translocations have been reported in DLBCL [36–40]. In our series of IgM-secreting DLBCL these were not a distinct feature. None of the tumors showed MYC rearrangement and only two cases harbored BCL2 translocation.

**Table 3.** Survival analyses comparison for main predictors.

| Predictors                                              | 36-month rate  | P-value |
|---------------------------------------------------------|----------------|---------|
| <b>Progression free survival</b>                        |                |         |
| Non-GCB <sup>1</sup> (yes vs no)                        | 54.5% vs 85%   | <.0001  |
| IgM-secreting (yes vs no)                               | 23.5% vs 75.7% | <.0001  |
| Immunoblastic Morphology (yes vs no)                    | 23.5% vs 75.7% | <.0001  |
| Anemia HB<12 g/dL (yes vs no)                           | 52.7% vs 80.7% | .001    |
| IPI <sup>2</sup> (0–2 vs 3–5)                           | 52.8% vs 90.4% | <.0001  |
| ALC <sup>3</sup> ≤0.840. 10 <sup>9</sup> /L (yes vs no) | 51.6% vs 75.3% | .003    |
| Bone marrow involvement (yes vs no)                     | 46.3% vs 79%   | .001    |
| <b>Overall survival</b>                                 |                |         |
| IgM-secreting (yes vs no)                               | 47.1% vs 74.8% | <.0001  |
| Immunoblastic Morphology (yes vs no)                    | 47.1% vs 74.8% | <.0001  |
| IPI (0–2 vs 3–5)                                        | 56.9% vs 90.4% | <.0001  |
| ALC ≤0.840. 10 <sup>9</sup> /L (yes vs no)              | 61.3% vs 76.5% | .022    |
| Bone marrow involvement (yes vs no)                     | 58.5% vs 76.5% | .024    |

Non-GCB<sup>1</sup> = Non Germinal Center type, evaluated on the basis of the Hans' algorithm.

IPI<sup>2</sup> = international prognostic index scores 0–2 and 3–5.

ALC<sup>3</sup> = absolute lymphocyte count.

doi:10.1371/journal.pone.0093903.t003

In 2011 Maurer et al [16], showed that increased serum FLC, present in 32% of DLBCL was an independent adverse prognostic factor. More recently, after the introduction of a new sensitive method for immunoglobulin heavy chain detection, a prospective study showed elevated IgM $\kappa$  or IgM $\lambda$  or an abnormal IgM $\kappa$ /IgM $\lambda$  ratio to occur in 9.3% and 19.1% of DLBCL respectively [17]. Similarly to us, they found a lower PFS and OS in patients with IgM serological abnormalities. Although the two methods are not perfectly comparable, patients with a serum monoclonal IgM detected by immunofixation, as we did in our study, should reasonably have an abnormal IgM $\kappa$ /IgM $\lambda$  ratio and possibly also an elevated IgM $\kappa$  or IgM $\lambda$  immunoglobulin. The lower sensitivity of our method and the fact that we carried out serum immunofixation only in those patients who had an abnormal protein electrophoresis could explain why the proportion of IgM-secreting DLBCL in our series was somewhat lower compared to that with an abnormal IgM $\kappa$ /IgM $\lambda$  ratio described by Jardin et al. [17]. Conversely, Jardin et al. using a very sensitive detection method (Binding Site's Hevylite assay, San Diego, CA, USA) could have possibly found cases with an abnormal IgM $\kappa$ /IgM $\lambda$  ratio or an elevated IgM $\kappa$  or IgM $\lambda$  without a real clinical significance.

The expression of the heavy chain IgM gene was shown in the Wright signature to be one of the most discriminating genes between GCB and ABC DLBCL subtypes [41–42]. It has been

also reported that IgM isotype expression in tumor tissues is a more powerful prognostic marker than the Hans algorithm [43]. In our series the expression of heavy chain IgM in tumor cells was found in less than half of the patients. IgM+ cases were mostly classified as non-GCB-type and a third of the cases belonging to this group were also IgM-secreting. Survival analyses of IgM+/non-secreting subset was similar to that of IgM-negative patients. Although we could not analyze all the series by IHC for heavy chain IgM, our data suggests that the poor prognosis attributed to IgM+ cases could be at least in part related to those patients who are IgM-secreting. Notably, monitoring patients by immunofixation and FLC  $\kappa/\lambda$  ratio during and after therapy was of little value for predicting tumor relapse. Indeed, even in overt relapse, three out of four patients were found negative for serum IgM monoclonal component. It can be speculated that this finding is the result of a clonal evolution of lymphoma cells during progression leading to loss of secretion capability.

Recently, it has been identified a plasmablastic subtype of DLBCL thought to derive from terminally differentiated B-cells [44]. This subset is frequently associated with HIV and EBV infection and is considered a very poor prognostic group. The IgM-secreting subset we characterized, was HIV and EBV negative [45–46] and did not show the morphological and immunophenotypic findings of plasmablastic lymphoma. Conversely, the majority of IgM-secreting cases showed immunoblastic

**Table 4.** Multivariate analyses for the response and survival.

| Progression free survival | Exp(B) (95%CI)      | P-value |
|---------------------------|---------------------|---------|
| IPI (3–5) <sup>1</sup>    | 0.274(0.102–0.737)  | .010    |
| IgM-secreting             | 0.339(0.160–0.716)  | .005    |
| <b>Overall survival</b>   |                     |         |
| IPI (3–5)                 | 0.186 (0.071–0.484) | 0.001   |

IPI<sup>1</sup> (3–5): International prognostic score index value 3–5.

doi:10.1371/journal.pone.0093903.t004

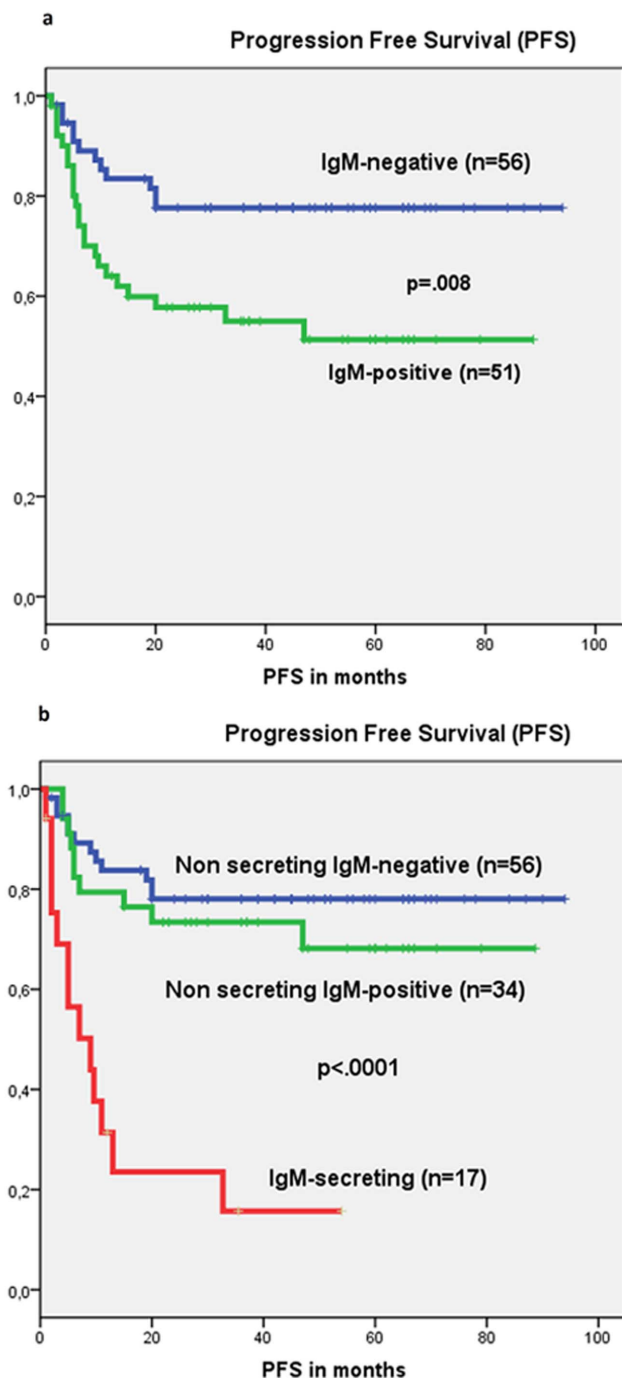

**Figure 3.** a) Kaplan-Meier estimates of progression free survival (PFS) in patients who are positive for heavy chain IgM (IgM+) by Immunohistochemistry (IHC) and in patients who are negative for heavy chain IgM (IgM-negative) by IHC. b) Kaplan-Meier estimates of PFS in patients negative for heavy chain IgM expression by IHC (IgM-negative), in patients positive for heavy chain IgM expression by IHC but non-secreting (IgM+/non-secreting) and in patients positive for heavy chain IgM expression by IHC and IgM-secreting (IgM-secreting).  
doi:10.1371/journal.pone.0093903.g003

features. This finding is in accordance with the notion that secreting capability is acquired by B-cells during end-stage differentiation and that terminally differentiated high grade lymphoma has a poor prognosis [44,47–48].

In our series of IgM-secreting DLBCL, we found a strikingly high incidence of CNS involvement. This finding is in keeping with previous studies showing that primary lymphoma of the central nervous system expresses an IgM isotype [49–51], and with the detection of FLC in the cerebrospinal fluid of patients with CNS lymphoma [52]. If our observation will be validated by further studies, an intensified CNS prophylaxis should be recommended in patients with IgM-secreting DLBCL.

Outcome after R-CHOP was disappointing in IgM-secreting patients with most relapses occurring within one year from diagnosis. Interestingly, four patients who relapsed without CNS involvement achieved lasting complete remission when treated with immunochemotherapy combined with biological drugs such as bortezomib or lenalidomide [31–32]. This fact might suggest that these combinations could be more effective and less toxic than high-intensity treatments in this very poor risk group.

Finally, we speculate that IgM-secretion in DLBCL has since been underrated because it is easily missed by clinicians given the rarity of associated clinical signs, its low entity at diagnosis and rapid disappearance during treatment.

The main limitations of our study pertain to its retrospective nature. IgM expression analysis and COO subtyping were not assessable in all the cases because of the lack of suitable material. Moreover, we classified tumors basing on the Hans' algorithm, which is less sensitive and specific than GEP analysis [5]. We also regret that during follow-up serum immunofixation and FLC k/λ ratio were done only in roughly half of the patients.

In DLBCL patients the identification of reliable prognostic markers that may guide in selecting a more specific treatment is of considerable importance [53]. Widely used and inexpensive routine analysis could easily detect serum monoclonal IgM component. Further confirmation by immunohistochemistry or by other molecular detection assays of IgM expression by tumor cells [43,54] would allow to identify IgM-secreting DLBCL. We believe that IgM-secreting capability represents a very robust prognostic marker, since it is related to a defined biological characteristic of DLBCL derived from terminally differentiated B-lymphocytes.

## Supporting Information

**File S1** Supplementary Materials.  
(DOCX)

## Acknowledgments

We are deeply in debt with Professor Vincenzo Ambrogi for scientific advice in editing this paper and with Claudia Cippitelli for technical support.

## Author Contributions

Conceived and designed the experiments: MCC ADN LR. Analyzed the data: MCC C. Tatarelli SS SA. Wrote the paper: MCC ADN LR BM GS SA. Contributed to morphological, FISH, immunohistochemistry and serological analyses: ADN SS C. Talerico GS LR ML.



## References

- Campo E, Swerdlow SH, Harris NL, Pileri S, Stein H, et al. (2011) The 2008 WHO classification of lymphoid neoplasms and beyond: evolving concepts and practical applications. *Blood* 117: 5019–32.
- Fu K, Weisenburger DD, Choi WW, Perry KD, Smith LM, et al. (2008) Addition of rituximab to standard chemotherapy improves the survival of both the germinal center B-cell-like and non-germinal center B-cell-like subtypes of diffuse large B-cell lymphoma. *J Clin Oncol* 26:28: 4587–94.
- Sehn LH, DJ, Chanabhai M, Fitzgerald C, Gill K, Klasa R, et al. (2005) Introduction of combined CHOP plus rituximab therapy dramatically improved outcome of diffuse large B-cell lymphoma in British Columbia. *J Clin Oncol* 23: 5027–5033.
- Project, TIN-HsLFP (1993) A predictive model for aggressive non-Hodgkin's lymphoma The International Non-Hodgkin's Lymphoma Prognostic Factors Project. *N Engl J Med* 329: 987–994.
- Alizadeh AA, Davis EM, Ma RE, Lossos C, Rosenwald A, et al. (2000) Distinct types of diffuse large B-cell lymphoma identified by gene expression profiling. *Nature* 3; 403: 503–511.
- Visco C, LY, Xu Monette ZY, Miranda RN, Green TM, Li Y, et al. (2012) Comprehensive gene expression profiling and immunohistochemical studies support application of immunophenotypic algorithm for molecular subtype classification in diffuse large B-cell lymphoma: a report from the International DLBCL Rituximab-CHOP Consortium Program Study. *Leukemia* 26: 2103–2113.
- Advani RH, Habermann CH, Morrison TM, Weller VA, Fisher EA, et al. (2010) Comparison of conventional prognostic indices in patients older than 60 years with diffuse large B-cell lymphoma treated with R-CHOP in the US Intergroup Study ECOG 4494, CALGB 9793: consideration of age greater than 70 years in an elderly prognostic index E-IPI. *Br J Haematol* 151: 143–151.
- Cox MC, Nofroni I, Ruco L, Amodeo R, Ferrari A, et al. (2008) Low absolute lymphocyte count is a poor prognostic factor in diffuse-large-B-cell-lymphoma. *Leuk Lymphoma* 49:1745–51.
- Barrans S, Crouch S, Smith A, Turner K, Owen R, et al. (2010) Rearrangement of MYC is associated with poor prognosis in patients with diffuse large B-cell lymphoma treated in the era of rituximab. *J Clin Oncol* 28:20: 3360–65.
- Green TM, Young KH, Visco C, Xu-Monette ZY, Orazi A, et al. (2012) Immunohistochemical Double-Hit Score Is a Strong Predictor of Outcome in Patients With Diffuse Large B-Cell Lymphoma Treated With Rituximab Plus Cyclophosphamide, Doxorubicin, Vincristine, and Prednisone. *J Clin Oncol* 30:28: 3460–7.
- Johnson NA, Slack GW, Savage KJ, Connors JM, Ben-Neriah S, et al. (2012) Concurrent expression of MYC and BCL2 in diffuse large B-cell lymphoma treated with rituximab plus cyclophosphamide, doxorubicin, vincristine, and prednisone. *J Clin Oncol* 30:28: 3452–59.
- Horn H, Becher ZM, Barth C, Bernd TF, Feller HW, et al. (2013) MYC status in concert with BCL2 and BCL6 expression predicts outcome in diffuse large B-cell lymphoma. *Blood* 121: 2253–63.
- Noguchi M, Yamazaki S, Suda K, Sato N, Oshimi K, et al. (2003) Multifocal motor neuropathy caused by a B-cell lymphoma producing a monoclonal IgM autoantibody against peripheral nerve myelin glycolipids GM1 and GD2b. *Br J Haematol* 123:4: 600–605.
- Lin P, Hao S, Handy BC, Bueso-Ramos CE, Medeiros J, et al. (2005) Lymphoid neoplasms associated with IgM paraprotein: a study of 382 patients. *Am J Clin Pathol* 123:2: 200–205.
- Eskazan AE, Akmurad H, Ongoren S, Ozer O, Ferhanoglu B (2011). Primary gastrointestinal diffuse large B cell lymphoma presenting with cold agglutinin disease. *Case Rep Gastroenterol* 5: 262–266.
- Maurer MJ, Micallef INM, Cerhan JR, Katzmann JA, Link BK, et al. (2011) Elevated serum free light chains are associated with event-free and overall survival in two independent cohorts of patients with diffuse large B-cell lymphoma. *J Clin Oncol* 29:12: 1620–1626.
- Jardin F, Molina TJ, Copie Bergman C, Brièr J, Petrella T, et al. (2013) Immunoglobulin heavy chain/light chain pair measurement is associated with survival in diffuse large B-cell lymphoma. *Leuk Lymphoma* 54:1898–907.
- Cox MC, Di Napoli A, Scarpino S, Cavalieri E, Naso V, et al. (2012) Diffuse-Large-B-Cell Lymphoma Patients With Secreting IgM Monoclonal Component is a Very Poor Prognostic Subset. *Blood* 120: 2659
- Swerdlow SH, Campo E, Harris NL, Jaffe ES, Pileri S, et al. (2008) WHO classification of Tumors of Haematopoietic and lymphoid Tissues. IARC press, Lyon.
- Pfreundschuh M, Trümper L, Kloess M, Schmits R, Feller AC, et al. (2004). Two-weekly or 3-weekly CHOP chemotherapy with or without etoposide for the treatment of young patients with good-prognosis (normal LDH) aggressive lymphomas: results of the NHL-B1 trial of the DSHNHL. *Blood* 104: 626–33.
- Marzano A, Angelucci E, Andreone P, Brunetto M, Bruno R, et al. (2007) Italian Association for the Study of the Liver. Prophylaxis and treatment of hepatitis B in immunocompromised patients. *Dig Liver Dis* 39: 397–408.
- Hans CP, Weisenburger DD, Greiner TC, Gascoyne RD, Delabie J, et al. (2004). Confirmation of the molecular classification of diffuse large B-cell lymphoma by immunohistochemistry using a tissue microarray. *Blood* 103(1):275–82.
- Ventura RA, Martin-Subero JI, Jones M, McParland J, Gesk S, et al. (2006) FISH analysis for the detection of lymphoma-associated chromosomal abnormalities in routine paraffin-embedded tissue. *J Mol Diagn* 8:2:141–51.
- Xu L, Hunter ZR, Yang G, Zhou Y, Cao Y, et al. (2013) Monoclonal gammopathy, and other B-cell lymphoproliferative MYD88 L265P in Waldenström macroglobulinemia, immunoglobulin M disorders using conventional and quantitative allele-specific polymerase chain reaction. *Blood* 121: 2051–58.
- Cheson BD, Pfistner B, Juweid ME, Gascoyne RD, Specht L, et al. (2007) Revised response criteria for malignant lymphoma. *J Clin Oncol* 25: 579–86.
- Kaplan EL (1958) Meier P Non-parametric estimation from incomplete observations. *J Am Stat Assoc* 53: 457–81.
- Cox D (1972) Regression models and life tables. *J R Stat Assoc* 34: 187–220.
- Choi JW, Kim Y, Lee JH, Kim YS (2013) MYD88 expression and L265P mutation in diffuse large B-cell lymphoma. *Hum Pathol* 44: 1375–81.
- Lohr JG, Stojanov P, Lawrence MS, Auclair D, Chapuy B, et al. (2012) Discovery and prioritization of somatic mutations in diffuse large B-cell lymphoma DLBCL by whole-exome sequencing. *Proc Natl Acad Sci U S A* 109:10: 3879–84.
- Kraan W, Horlings HM, van Keimpema M, Schilder-Tol EJ, Oud ME, et al. (2013) High prevalence of oncogenic MYD88 and CD79B mutations in diffuse large B-cell lymphomas presenting at immune-privileged sites. *Blood Cancer J* doi: 10.1038/bcj.2013.28.
- Zinzani PL, PC, Merla E, Ballerini F, Fabbri A, Guarini A, et al. (2012) bortezomib as salvage treatment for heavily pretreated relapsed lymphoma patients: a multicentre retrospective study. *Hematological Oncology*, in press.
- Rigacci L, Vitolo U, Cox MC, Devizzi L, Fabbri A, et al. (2012) Lenalidomide Is Effective in Heavily Pretreated Non Hodgkin Lymphoma NHL: Analysis of a Retrospective Data Collection. *Blood* 120: 3694.
- Vitolo U, Angelucci E, Rossi G, Liberati AM, Cabras MG, et al. (2009) Dose-dense and high-dose chemotherapy plus rituximab with autologous stem cell transplantation for primary treatment of diffuse large B-cell lymphoma with a poor prognosis: a phase II multicenter study. *Haematologica* 94: 1250–1258.
- Ngo VN, Young RM, Schmitz R, Jhavar S, Xiao W, et al. (2011). Oncogenically active MYD88 mutations in human lymphoma. *Nature* 470:115–9.
- Randen U, Trøen G, Tierens A, Steen C, Warsame A, et al. (2014) Primary cold agglutinin-associated lymphoproliferative disease: a B-cell lymphoma of the bone marrow distinct from lymphoplasmacytic lymphoma. *Haematologica* 99: 497–504.
- Kramer MH, Hermans J, Wijburg E, Philippo K, Geelen E, et al. (1998) Clinical relevance of BCL2, BCL6, and MYC rearrangements in diffuse large B-cell lymphoma. *Blood* 92: 3152–3162.
- Copie-Bergman C, Gaulard P, Leroy K, Briere J, Baia M, et al. (2009) Immunofluorescence in situ hybridization index predicts survival in patients with diffuse large B-cell lymphoma treated with R-CHOP: a GELA Study. *J Clin Oncol* 27: 5573–5579.
- Barrans SL, Evans PA, O'Connor SJ, Kendall SJ, Owen RG, et al. (2003) The t(14;18) is associated with germinal center-derived diffuse large B-cell lymphoma and is a strong predictor of outcome. *Clin Cancer Res* 9: 2133–2139.
- Akyurek N, Uner A, Benekli M, Barista I (2012) Prognostic significance of MYC, BCL2, and BCL6 rearrangements in patients with diffuse large B-cell lymphoma treated with cyclophosphamide, doxorubicin, vincristine, and prednisone plus rituximab. *Cancer* 118: 4173–83.
- Pedersen MO, Gang AO, Poulsen TS, Knudsen H, Lauritzen AF, et al. (2014) MYC translocation partner gene determines survival of patients with large B-cell lymphoma with MYC- or double-hit MYC/BCL2 translocations. *Eur J Haematol* 92: 42–8.
- Lenz G, Siebert R, Roschke AV, Sanger W, Wright GW, et al. (2007) Aberrant immunoglobulin class switch recombination and switch translocations in activated B cell-like diffuse large B cell lymphoma. *J Exp Med* 204:3: 633–643.
- Wright G, Tan B, Rosenwald A, Hurt EH, Wiestner A, et al. (2003) A gene expression-based method to diagnose clinically distinct subgroups of diffuse large B cell lymphoma. *Proc Natl Acad Sci USA* 100: 9991–9996.
- Ruminy P, Couronné L, Parmentier F, Rainville V, Mareschal S, et al. (2011) The isotype of the BCR as a surrogate for the GCB and ABC molecular subtypes in diffuse large B-cell lymphoma. *Leukemia* 25:4: 681–688.
- Montes-Moreno S, Rodriguez Pinilla MA, Maestre SM, Sanchez Verde L, Roncador G, et al. (2010) Aggressive large B-cell lymphoma with plasma cell differentiation: immunohistochemical characterization of plasmablastic lymphoma and diffuse large B-cell lymphoma with partial plasmablastic phenotype. *Haematologica* 95:8: 1342–1349.
- Hoeller S, Tzankov A, Pileri SA, Went P, Dirmhofer S, et al. (2010) Epstein-Barr virus-positive diffuse large B-cell lymphoma in elderly patients is rare in Western populations. *Hum Pathol* 41:352–357.
- Ahn JS, Yang DH, Duk Choi Y, Jung SH, Yhim HY, et al. (2013) Clinical outcome of elderly patients with Epstein-Barr virus positive diffuse large B-cell lymphoma treated with a combination of rituximab and CHOP chemotherapy. *Am J Hematol* 88:774–9.
- Lennert K, Feller A (1992) *Histopathology of Non-Hodgkin's Lymphomas*. New York: Springer Verlag.
- Ott G, Ziepert M, Klapper W, Horn H, Szczepanowski M, et al. (2010) Immunoblastic morphology but not the immunohistochemical GCB/non-GCB

- classifier predicts outcome in diffuse large B-cell lymphoma in the RICOVER-60 trial of the DSHNHL. *Blood* 116: 4916–25.
49. Kohyama S, NH, Shima K, Shimazaki H (2001) Primary central nervous system lymphoma with paraproteinemia. *Surg Neurol* 56: 325–328.
  50. Montesinos-Rongen M, Courts SR, Stenzel CW, Bechtel D, Niedobitek G, et al. (2005) Absence of immunoglobulin class switch in primary lymphomas of the central nervous system. *Am J Pathol* 166:1773–9.
  51. Ria R, Occhiogrosso G, Ciappetta P, Ribatti D, Vacca A, et al. (2009) Monoclonal gammopathy as a marker of primary cerebral lymphoma. *Eur J Clin Invest* 39: 627–629.
  52. Schroers R, Baraniskin A, Heute C, Kuhnenn J, Alekseyev A, et al. (2010) Detection of free immunoglobulin light chains in cerebrospinal fluids of patients with central nervous system lymphomas. *Eur J Haematol* 85:236–242.
  53. Martelli M, Ferreri A, Agostinelli C, Di Rocco A, Pfreundschuh M, et al. (2013) Diffuse large B-cell lymphoma. *Crit Rev Oncol Hematol* 87:146–71.
  54. Koens L, Willemze R, Jansen PM (2010) IgM expression on paraffin sections distinguishes primary cutaneous large B-cell lymphoma, leg type from primary cutaneous follicle center lymphoma. *Am J Surg Pathol* 34: 1043–1048.
